# Supplementary material
Source: PubMed Central journal article supplement (PMC3346396)
Supplement: supp_78.11.3950_AEM-AEM08018-11-s01.pdf [file supp_78.11.3950_AEM-AEM08018-11-s01.pdf]

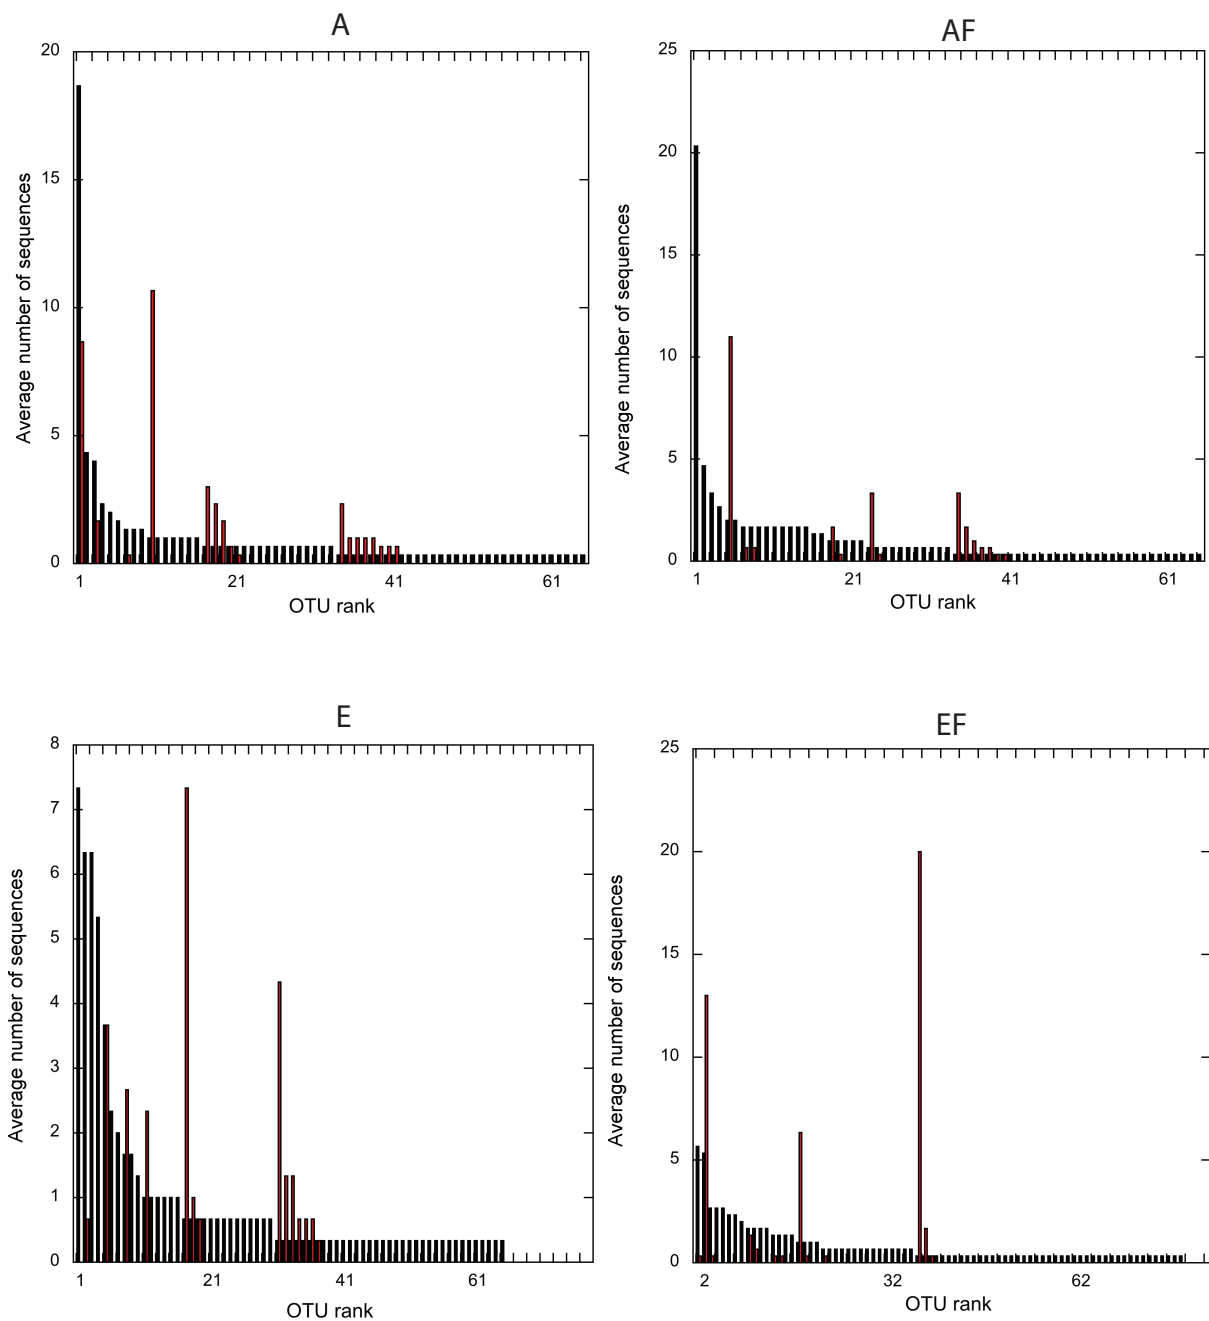

Figure S11. Rank abundance curves for the 12 April 2010 DNA-based libraries (three replicate libraries from each treatment summed together) derived from field plots under the four field treatments (A=Ambient CO<sub>2</sub>, AF=Ambient CO<sub>2</sub>-N-fertilized, E=Elevated CO<sub>2</sub>, EF=Elevated CO<sub>2</sub>-N-fertilized; black bars). The summed abundance of OTUs from the three corresponding cDNA-based libraries from each of the field treatments are also plotted (red bars).
