# Supplementary material
Source: PubMed Central journal article supplement (PMC3346396)
Supplement: supp_78.11.3950_AEM-AEM08018-11-s02.pdf [file supp_78.11.3950_AEM-AEM08018-11-s02.pdf]

**Table S12.** Numbers of fungal *cbhI* fragments sequenced in replicate cDNA or DNA templates derived from each field plot (1, 2, 3, 4, 5 and 6) and field treatment (A=ambient CO<sub>2</sub>, E=elevated CO<sub>2</sub>, EF=elevated CO<sub>2</sub> and nitrogen fertilized, AF=ambient CO<sub>2</sub> and nitrogen fertilized).

| <b><u>Plot/field treatment</u></b> | <b><u>cDNA</u></b> | <b><u>DNA</u></b> |
|------------------------------------|--------------------|-------------------|
| 1A                                 | 41                 | 63                |
| 1AF                                | 36                 | 56                |
| 2E                                 | 78                 | 71                |
| 2EF                                | 31                 | 73                |
| 3E                                 | 128                | 69                |
| 3EF                                | 86                 | 71                |
| 4E                                 | 120                | 56                |
| 4EF                                | 152                | 55                |
| 5A                                 | 36                 | 84                |
| 5AF                                | 137                | 81                |
| 6A                                 | 110                | 70                |
| 6AF                                | 25                 | 90                |
